# Supplementary material for: Neuroimmune-related differentially expressed genes in psoriasis: A bioinformatics analysis reveals potential biomarkers for diagnosis and treatment
Source: Research Square preprint supplement (doi:10.21203/rs.3.rs-8700962/v1), 2026-02-09
Supplement: Supplementary file 2 [file 2ca6ee5581284b7e5d081a24.xlsx]

## Sheet: Appendix 1.NRDEGs
NRDEGs
ENO2
LCN2
IL1B
IFIH1
SELL
DPYSL2
GREM2
CHRM3
EXO1
PPARG
LTF
AKT3
CXCL13
NTF3
CXCL1
APP
HMGB1
FH
F10
RGS2
NOS2
CXCL8
CCL4
SELE
TREM2
TNFSF13B
GRIN2A
CTLA4
PSMD2
ADAM17
TRPM7
PINK1
ABHD16A
ECE2
CD80
AQP4
VIP
TACR1
CHML
TNF
TGFB1
PLD5
MBP
CCL5
ICAM1
ATM
B2M
CD28
TNFSF13
DGCR5
NGFR
F2
C11orf65
MPO
BACE1
NLRP3
TAC3
GRID2
CD40
RGS7
SST
RYR2
CHGA
IL10
NOS1
VCAM1
KMO
CNTNAP2
