# Supplementary material for: Neuroimmune-related differentially expressed genes in psoriasis: A bioinformatics analysis reveals potential biomarkers for diagnosis and treatment
Source: Research Square preprint supplement (doi:10.21203/rs.3.rs-8700962/v1), 2026-02-09
Supplement: Supplementary file 3 [file 52da4ff87b55529b94c15f60.xlsx]

## Sheet: Supplementary Table 3.Logoutput
	gene	OR	OR_1	OR_2	pvalue	OR(95% CI)
1	ABHD16A	-3.83189	-5.39035	-2.41428	4.2e-07	-3.83(-5.39~-2.41)
2	ADAM17	-3.01937	-4.23453	-1.91126	3.2e-07	-3.02(-4.23~-1.91)
3	AKT3	5.55931	4.07892	7.22446	3.7e-12	5.56(4.08~7.22)
4	APP	3.75164	2.64461	4.96514	2.1e-10	3.75(2.64~4.97)
5	AQP4	10.5561	6.25261	15.4472	6.4e-06	10.56(6.25~15.45)
6	ATM	2.19998	0.941372	3.52395	0.00081	2.2(0.94~3.52)
7	B2M	1.57327	0.637545	2.55388	0.0012	1.57(0.64~2.55)
8	BACE1	1.74179	0.609751	2.92178	0.003	1.74(0.61~2.92)
9	C11orf65	4.67142	1.70637	7.89956	0.0029	4.67(1.71~7.9)
10	CCL4	-1.44794	-1.98159	-0.971571	1.7e-08	-1.45(-1.98~-0.97)
11	CCL5	-0.70198	-1.10094	-0.323858	0.00038	-0.7(-1.1~-0.32)
12	CD28	-1.97607	-3.17915	-0.853492	0.00084	-1.98(-3.18~-0.85)
13	CD40	-1.23092	-2.10363	-0.411864	0.0042	-1.23(-2.1~-0.41)
14	CD80	-4.67781	-6.84866	-2.83025	4.5e-06	-4.68(-6.85~-2.83)
15	CHGA	1.24589	0.339408	2.20954	0.0086	1.25(0.34~2.21)
16	CHML	2.73616	1.41505	4.11464	6.8e-05	2.74(1.42~4.11)
17	CHRM3	5.5392	4.05108	7.32354	2.6e-11	5.54(4.05~7.32)
18	CNTNAP2	-1.0939	-1.86203	-0.395475	0.0033	-1.09(-1.86~-0.4)
19	CTLA4	-2.98517	-4.08855	-1.97314	2.9e-08	-2.99(-4.09~-1.97)
20	CXCL1	-1.31911	-1.68051	-1.00339	1.8e-14	-1.32(-1.68~-1)
21	CXCL13	-2.12647	-2.7966	-1.56428	1.3e-11	-2.13(-2.8~-1.56)
22	CXCL8	-0.664408	-0.868315	-0.482561	1.3e-11	-0.66(-0.87~-0.48)
23	DGCR5	-4.98113	-8.25269	-1.96987	0.0019	-4.98(-8.25~-1.97)
24	DPYSL2	2.95818	2.22629	3.77331	5.4e-14	2.96(2.23~3.77)
25	ECE2	-3.0118	-4.21509	-1.93302	2.2e-07	-3.01(-4.22~-1.93)
26	ENO2	3.79669	2.91037	4.82136	5.4e-15	3.8(2.91~4.82)
27	EXO1	-5.93701	-7.84487	-4.34564	2.3e-11	-5.94(-7.84~-4.35)
28	F10	2.80613	1.99315	3.72775	2e-10	2.81(1.99~3.73)
29	F2	-0.458632	-0.790151	-0.132669	0.0062	-0.46(-0.79~-0.13)
30	FH	-3.00446	-4.00679	-2.08774	7.4e-10	-3(-4.01~-2.09)
31	GREM2	4.86405	3.6503	6.29283	4e-13	4.86(3.65~6.29)
32	GRID2	-0.368484	-0.655198	-0.086178	0.011	-0.37(-0.66~-0.09)
33	GRIN2A	6.28465	4.08449	8.83122	1.8e-07	6.28(4.08~8.83)
34	HMGB1	4.57615	3.2363	6.03369	1.3e-10	4.58(3.24~6.03)
35	ICAM1	-0.99505	-1.59137	-0.436615	0.0007	-1(-1.59~-0.44)
36	IFIH1	-3.93672	-5.05661	-2.95834	1.5e-13	-3.94(-5.06~-2.96)
37	IL10	-2.20468	-4.10306	-0.448829	0.017	-2.2(-4.1~-0.45)
38	IL1B	-2.31368	-2.96693	-1.7407	1.2e-13	-2.31(-2.97~-1.74)
39	KMO	-1.22441	-2.28564	-0.210646	0.02	-1.22(-2.29~-0.21)
40	LCN2	-0.88529	-1.09852	-0.698506	3e-18	-0.89(-1.1~-0.7)
41	LTF	-0.816685	-1.02103	-0.636497	6.7e-17	-0.82(-1.02~-0.64)
42	MBP	2.46905	1.13168	3.88976	0.00043	2.47(1.13~3.89)
43	MPO	-0.966049	-1.60027	-0.373232	0.0019	-0.97(-1.6~-0.37)
44	NGFR	1.39734	0.515884	2.36228	0.003	1.4(0.52~2.36)
45	NLRP3	-1.88712	-3.13963	-0.698259	0.0024	-1.89(-3.14~-0.7)
46	NOS1	1.49066	0.38165	2.68086	0.011	1.49(0.38~2.68)
47	NOS2	-2.3391	-3.15971	-1.634	1.5e-09	-2.34(-3.16~-1.63)
48	NTF3	3.40178	2.46268	4.48868	3.8e-11	3.4(2.46~4.49)
49	PINK1	1.87745	1.17686	2.62845	3.7e-07	1.88(1.18~2.63)
50	PLD5	5.70823	2.68143	8.95121	0.00035	5.71(2.68~8.95)
51	PPARG	2.9625	2.15233	3.9213	4.4e-11	2.96(2.15~3.92)
52	PSMD2	-3.10857	-4.25737	-2.05321	3e-08	-3.11(-4.26~-2.05)
53	RGS2	1.90003	1.30986	2.541	1.3e-09	1.9(1.31~2.54)
54	RGS7	3.71711	1.05631	6.5962	0.0082	3.72(1.06~6.6)
55	RYR2	3.34625	0.921187	5.90622	0.0082	3.35(0.92~5.91)
56	SELE	-0.305302	-0.458071	-0.165099	4.1e-05	-0.31(-0.46~-0.17)
57	SELL	-2.22244	-2.8646	-1.66273	3.6e-13	-2.22(-2.86~-1.66)
58	SST	-0.381597	-0.672516	-0.0962746	0.0093	-0.38(-0.67~-0.1)
59	TAC3	1.20961	0.426981	2.02603	0.003	1.21(0.43~2.03)
60	TACR1	3.34747	1.85061	4.96649	2.4e-05	3.35(1.85~4.97)
61	TGFB1	-2.0989	-3.26079	-1.02696	0.00022	-2.1(-3.26~-1.03)
62	TNF	-1.67141	-2.56374	-0.854741	0.00012	-1.67(-2.56~-0.85)
63	TNFSF13	-1.25147	-2.05384	-0.485843	0.0017	-1.25(-2.05~-0.49)
64	TNFSF13B	-1.35012	-1.85456	-0.886219	4.2e-08	-1.35(-1.85~-0.89)
65	TREM2	-3.30573	-4.57064	-2.20853	3.4e-08	-3.31(-4.57~-2.21)
66	TRPM7	4.43495	2.80838	6.18914	2.5e-07	4.43(2.81~6.19)
67	VCAM1	-0.598446	-1.08695	-0.151904	0.012	-0.6(-1.09~-0.15)
68	VIP	4.53172	2.52279	6.78859	2.9e-05	4.53(2.52~6.79)
