# Supplementary material for: Neuroimmune-related differentially expressed genes in psoriasis: A bioinformatics analysis reveals potential biomarkers for diagnosis and treatment
Source: Research Square preprint supplement (doi:10.21203/rs.3.rs-8700962/v1), 2026-02-09
Supplement: Supplementary file 4 [file 5483322b485ff587e55c93cf.xlsx]

## Sheet: Appendix 6.NRGs
NRGs
BDNF-AS
SMAD5-AS1
MUSK
SIRT2
CNTNAP2
LINC01672
MPO
CTLA4
LTF
LGI1
VIP
CERNA3
CD28
TREM2
CD80
IGKC
HCCAT5
PWAR1
NPY
IFIH1
TNF
CALCA
CHGA
IL1B
LINC02605
ADAM17
NGF
AQP4
IL2
TRD-GTC9-1
AKT3
CD40
IL2RB
CHRM3
NLRP3
CHRM2
RYR2
FH
KMO
IL1A
MBP
EXO1
PSMD2
RGS2
SDCCAG8
CCL3
CCL4
DPYSL5
GREM2
GRP
SST
RGS7
CEP170
ECE2
FMN2
ABHD16A
CHML
OPN3
PLD5
ZP4
IGHE
WDR64
PCAT1
ATM
PPARG
TGFB1
GRIN2A
APP
COMT
IL6
TH
B2M
BDNF
CD40LG
F10
F2
ICAM1
NOS1
NOS2
TNFRSF1A
HMGB1
PRKN
BACE1
ENO2
IL10
ITGAM
NGFR
TNFRSF11A
DPYSL2
IL4
NTF4
PINK1
VCAM1
CD33
PDE10A
GRID2
LCN2
NTF3
TNFSF13
TNFSF13B
TRPM7
CCL5
CRH
CXCL8
MEFV
SELE
TACR1
CXCL1
HLA-DQA1
SELL
TAC3
CXCR5
CCN3
CXCL13
TAC1
DEFB1
IL1RAPL2
DPYSL4
KLHL11
C11orf65
ATXN8OS
H19
SOX2-OT
MIR133B
DGCR5
SCARNA5
BCYRN1
HAR1A
MIR98
DISC2
FMR1-AS1
NRON
SNHG14
BACE1-AS
TRA-TGC7-1
