# Supplementary material for: Neuroimmune-related differentially expressed genes in psoriasis: A bioinformatics analysis reveals potential biomarkers for diagnosis and treatment
Source: Research Square preprint supplement (doi:10.21203/rs.3.rs-8700962/v1), 2026-02-09
Supplement: Supplementary file 5 [file 653cdc9626c4c2c9275ad894.xlsx]

## Sheet: Appendix 3.mRNA-miRN
node1	node2
IL1B	hsa-miR-326
IL1B	hsa-miR-495-3p
IL1B	hsa-miR-330-5p
IL1B	hsa-miR-888-5p
IL1B	hsa-miR-5688
ENO2	hsa-miR-7-5p
ENO2	hsa-miR-665
ENO2	hsa-miR-3150a-3p
ENO2	hsa-miR-5047
