# Supplementary material for: Neuroimmune-related differentially expressed genes in psoriasis: A bioinformatics analysis reveals potential biomarkers for diagnosis and treatment
Source: Research Square preprint supplement (doi:10.21203/rs.3.rs-8700962/v1), 2026-02-09
Supplement: Supplementary file 6 [file 95a1c8b0f0c732c176bb9e15.xlsx]

## Sheet: Appendix 4. mRNA-RBP
node1	node2
ENO2	ACIN1
ENO2	ALYREF
ENO2	AQR
ENO2	BCLAF1
ENO2	CAPRIN1
ENO2	CELF2
ENO2	CHTOP
ENO2	CSTF2T
ENO2	CTCF
ENO2	DDX3X
ENO2	DDX54
ENO2	DHX36
ENO2	DROSHA
ENO2	EIF4A3
ENO2	ELAVL3
ENO2	FMR1
ENO2	FUS
ENO2	FXR2
ENO2	G3BP1
ENO2	GRSF1
ENO2	GRWD1
ENO2	GTF2F1
ENO2	HDLBP
ENO2	HLTF
ENO2	HNRNPA2B1
ENO2	HNRNPK
ENO2	IGF2BP1
ENO2	IGF2BP2
ENO2	IGF2BP3
ENO2	LIN28B
ENO2	MBNL2
ENO2	NUDT21
ENO2	PCBP2
ENO2	PRPF4
ENO2	PRPF8
ENO2	PTBP1
ENO2	RBFOX2
ENO2	RBM4
ENO2	RBMX
ENO2	SCAF4
ENO2	SCAF8
ENO2	SF3A3
ENO2	SF3B4
ENO2	SND1
ENO2	SOX2
ENO2	SRSF1
ENO2	SRSF2
ENO2	SRSF9
ENO2	TARDBP
ENO2	U2AF1
ENO2	U2AF2
ENO2	UPF1
ENO2	YBX1
ENO2	YTHDF3
GREM2	CHTOP
GREM2	DHX9
GREM2	ELAVL1
GREM2	FUS
GREM2	HNRNPC
GREM2	IGF2BP3
GREM2	SOX2
IL1B	U2AF1
IL1B	U2AF2
LCN2	IGF2BP3
LCN2	MTDH
SELL	CELF2
