# Supplementary material for: Neuroimmune-related differentially expressed genes in psoriasis: A bioinformatics analysis reveals potential biomarkers for diagnosis and treatment
Source: Research Square preprint supplement (doi:10.21203/rs.3.rs-8700962/v1), 2026-02-09
Supplement: Supplementary file 7 [file b20d156ecd0dde0d630c4fe2.xlsx]

## Sheet: Appendix 5. mRNA-TF
node1	node2
ENO2	ARNT
ENO2	ATF3
ENO2	BRD2
ENO2	BRD3
ENO2	BRD4
ENO2	CDK8
ENO2	CREB1
ENO2	CREBBP
ENO2	CTBP2
ENO2	E2F1
ENO2	E2F6
ENO2	EBF1
ENO2	EGR1
ENO2	ELF1
ENO2	EPAS1
ENO2	FOSL1
ENO2	FOSL2
ENO2	FOXA2
ENO2	GABPA
ENO2	GATA1
ENO2	IRF1
ENO2	JUN
ENO2	JUND
ENO2	KLF1
ENO2	MAX
ENO2	MAZ
ENO2	MYC
ENO2	MYOD1
ENO2	NFIC
ENO2	NR2F2
ENO2	NRF1
ENO2	PBX3
ENO2	POLR2A
ENO2	RAD21
ENO2	RNF2
ENO2	SMARCA4
ENO2	SMARCB1
ENO2	SMARCC1
ENO2	SMC1A
ENO2	SP1
ENO2	SPI1
ENO2	TFAP2A
ENO2	TFAP2C
ENO2	TFDP1
ENO2	USF1
ENO2	USF2
ENO2	VEZF1
ENO2	YY1
ENO2	ZBTB7A
ENO2	ZEB1
ENO2	ZNF263
GREM2	MAZ
IL1B	CEBPA
IL1B	CEBPB
IL1B	EP300
IL1B	ERG
IL1B	FLI1
IL1B	GATA1
IL1B	GRHL2
IL1B	HDAC1
IL1B	HDAC2
IL1B	IRF1
IL1B	LYL1
LCN2	BCL3
LCN2	BRD2
LCN2	BRD4
LCN2	CBX3
LCN2	CEBPA
LCN2	EGR1
LCN2	ELF1
LCN2	EP300
LCN2	FOS
LCN2	GABPA
LCN2	GATA1
LCN2	HCFC1
LCN2	JUND
LCN2	LMO2
LCN2	MAX
LCN2	MAZ
LCN2	POLR2A
LCN2	RCOR1
LCN2	SMARCA4
LCN2	SP1
LCN2	TBP
LCN2	TEAD4
LCN2	TFAP2C
SELL	CTCF
SELL	ERG
SELL	FLI1
SELL	FOXP1
SELL	HDAC1
